# Supplementary material for: Diversity and Trophic Relationships of Functional Groups of Bumblebees (Hymenoptera: Apidae, Bombus Latreille, 1802) in Urban Habitats
Source: Hindawi journal article supplement (doi:10.1155/2020/5182146), 2020-12-07
Supplement: f1 [file 5182146.f1.pdf]

**For plot**

**bipartite**

**networks**

**Bombus spp**

| Species plants         | B.veteran | B.campestris | B.rupestris | B.vestalis | B.muscorum | B.praetorum | B.argillaceus | B.sylvestris | B.bohemicus | B.sylvarum | B.humilis | B.soroeensis | B.subterraneus | B.hypnorum | B.hortorum | B.ruderarum | B.pascuorum | B.lapidarium | Blu/Bte |    |
|------------------------|-----------|--------------|-------------|------------|------------|-------------|---------------|--------------|-------------|------------|-----------|--------------|----------------|------------|------------|-------------|-------------|--------------|---------|----|
| Rhinanthus vernus      | 0         | 0            | 0           | 0          | 0          | 0           | 0             | 0            | 0           | 0          | 0         | 0            | 0              | 0          | 0          | 0           | 0           | 0            | 51      | 92 |
| Echium vulgare         | 0         | 0            | 0           | 0          | 0          | 1           | 0             | 0            | 1           | 1          | 0         | 2            | 0              | 3          | 0          | 5           | 0           | 0            | 53      | 64 |
| Cirsium arvense        | 1         | 0            | 3           | 1          | 0          | 2           | 0             | 0            | 0           | 1          | 0         | 1            | 0              | 4          | 0          | 1           | 9           | 0            | 42      | 63 |
| Trifolium pratense     | 0         | 0            | 0           | 0          | 0          | 0           | 0             | 0            | 0           | 1          | 0         | 4            | 3              | 1          | 0          | 25          | 2           | 0            | 34      | 48 |
| Spirea L.              | 0         | 0            | 0           | 0          | 0          | 0           | 0             | 0            | 0           | 0          | 0         | 0            | 0              | 2          | 0          | 0           | 14          | 0            | 29      | 67 |
| Tilia L.               | 0         | 0            | 0           | 0          | 0          | 0           | 0             | 0            | 0           | 0          | 0         | 1            | 0              | 7          | 0          | 4           | 2           | 0            | 31      | 52 |
| Trifolium repens       | 0         | 0            | 0           | 1          | 0          | 0           | 0             | 1            | 0           | 0          | 0         | 2            | 6              | 5          | 0          | 10          | 9           | 0            | 23      | 37 |
| Centaurea jacea        | 0         | 0            | 0           | 0          | 0          | 2           | 0             | 2            | 0           | 2          | 0         | 0            | 0              | 0          | 0          | 7           | 3           | 0            | 35      | 40 |
| Aesculus hippocastanum | 0         | 0            | 0           | 0          | 0          | 0           | 2             | 0            | 0           | 0          | 0         | 0            | 1              | 4          | 5          | 0           | 2           | 12           | 12      | 43 |
| Vicia L.               | 0         | 0            | 0           | 0          | 0          | 0           | 0             | 0            | 0           | 0          | 0         | 0            | 0              | 3          | 0          | 14          | 4           | 0            | 14      | 29 |
| Solidago canadensis    | 0         | 0            | 0           | 0          | 0          | 0           | 0             | 1            | 0           | 0          | 0         | 0            | 0              | 0          | 0          | 0           | 3           | 23           | 34      | 34 |
| Symphytum officinale   | 0         | 0            | 0           | 0          | 2          | 0           | 0             | 1            | 0           | 3          | 0         | 1            | 0              | 0          | 0          | 4           | 0           | 0            | 14      | 31 |
| Eryngium planum        | 1         | 0            | 0           | 0          | 0          | 0           | 0             | 2            | 0           | 0          | 0         | 0            | 0              | 0          | 0          | 1           | 0           | 0            | 17      | 33 |
| Lamium L.              | 0         | 0            | 0           | 0          | 0          | 0           | 6             | 0            | 0           | 0          | 0         | 2            | 2              | 14         | 3          | 0           | 2           | 12           | 7       | 7  |
| Betonica officinalis   | 0         | 1            | 0           | 0          | 0          | 0           | 0             | 0            | 1           | 0          | 0         | 0            | 0              | 1          | 3          | 0           | 3           | 9            | 25      | 25 |
| Hosta L.               | 0         | 0            | 0           | 0          | 0          | 0           | 0             | 0            | 0           | 0          | 0         | 0            | 0              | 12         | 2          | 0           | 13          | 3            | 13      | 13 |
| Securigeria varia      | 0         | 0            | 0           | 0          | 0          | 2           | 0             | 0            | 0           | 0          | 0         | 3            | 0              | 2          | 0          | 0           | 6           | 13           | 16      | 16 |
| Dahlia L.              | 1         | 3            | 1           | 2          | 0          | 0           | 0             | 0            | 1           | 0          | 0         | 3            | 0              | 5          | 0          | 0           | 4           | 4            | 4       | 17 |
| Malus L.               | 0         | 0            | 0           | 0          | 0          | 4           | 2             | 0            | 0           | 0          | 0         | 0            | 0              | 4          | 4          | 0           | 5           | 7            | 12      | 12 |
| Cephalaria gigantea    | 0         | 0            | 0           | 0          | 0          | 0           | 0             | 0            | 1           | 0          | 0         | 4            | 0              | 0          | 0          | 0           | 2           | 13           | 17      | 17 |
| Inula britannica       | 0         | 0            | 0           | 2          | 0          | 0           | 0             | 1            | 0           | 2          | 0         | 0            | 0              | 0          | 0          | 0           | 0           | 13           | 19      | 19 |
| Knautia arvensis       | 0         | 0            | 0           | 0          | 0          | 0           | 0             | 1            | 0           | 0          | 0         | 0            | 0              | 0          | 0          | 3           | 3           | 7            | 23      | 23 |
| Gypsophila L.          | 0         | 2            | 0           | 0          | 0          | 0           | 0             | 0            | 0           | 0          | 0         | 0            | 0              | 2          | 0          | 0           | 3           | 4            | 25      | 25 |
| Asclepias syriaca      | 0         | 0            | 0           | 0          | 0          | 0           | 0             | 0            | 0           | 0          | 0         | 0            | 0              | 0          | 0          | 0           | 0           | 4            | 30      | 30 |
| Pulmonaria L.          | 0         | 0            | 0           | 0          | 0          | 0           | 0             | 0            | 0           | 0          | 0         | 0            | 0              | 3          | 0          | 0           | 7           | 12           | 9       | 9  |
| Cytisus Desf.          | 0         | 0            | 0           | 0          | 0          | 0           | 0             | 0            | 0           | 0          | 21        | 0            | 0              | 1          | 0          | 0           | 2           | 3            | 2       | 2  |
| Taraxacum officinale   | 0         | 0            | 1           | 0          | 0          | 0           | 0             | 0            | 1           | 0          | 0         | 0            | 0              | 2          | 0          | 0           | 3           | 7            | 12      | 12 |
| Melilotus alba         | 0         | 0            | 0           | 0          | 0          | 0           | 0             | 0            | 0           | 0          | 0         | 0            | 0              | 3          | 0          | 2           | 2           | 3            | 15      | 15 |
| Origanum vulgare       | 0         | 0            | 0           | 0          | 0          | 0           | 0             | 0            | 0           | 0          | 0         | 0            | 0              | 0          | 0          | 0           | 9           | 1            | 13      | 13 |
| Salix L.               | 0         | 0            | 0           | 0          | 0          | 0           | 0             | 0            | 0           | 0          | 0         | 0            | 0              | 3          | 0          | 0           | 6           | 5            | 9       | 9  |
| Arctium lappa          | 0         | 0            | 0           | 0          | 0          | 0           | 0             | 0            | 1           | 0          | 0         | 0            | 1              | 2          | 1          | 0           | 8           | 3            | 4       | 4  |
| Robinia pseudoacacia   | 0         | 0            | 0           | 0          | 0          | 0           | 0             | 0            | 0           | 0          | 0         | 0            | 0              | 2          | 0          | 0           | 3           | 2            | 13      | 13 |
| Veronica L.            | 0         | 0            | 0           | 1          | 0          | 0           | 0             | 1            | 1           | 7          | 0         | 0            | 0              | 3          | 0          | 0           | 2           | 5            | 0       | 0  |
| Tagetes L.             | 0         | 0            | 0           | 0          | 0          | 0           | 0             | 0            | 0           | 0          | 0         | 0            | 0              | 3          | 0          | 0           | 2           | 5            | 7       | 7  |
| Crepis setosa          | 0         | 0            | 0           | 0          | 0          | 0           | 0             | 1            | 0           | 0          | 0         | 2            | 0              | 1          | 0          | 0           | 10          | 2            | 2       | 2  |
| Malva L.               | 0         | 0            | 0           | 0          | 0          | 0           | 0             | 0            | 0           | 0          | 0         | 0            | 0              | 2          | 0          | 0           | 3           | 2            | 8       | 8  |
| Rudbeckia hirta        | 0         | 0            | 1           | 0          | 0          | 0           | 0             | 0            | 1           | 0          | 0         | 0            | 0              | 1          | 0          | 0           | 5           | 7            | 7       | 7  |
| Salvia L.              | 0         | 0            | 0           | 0          | 0          | 0           | 0             | 0            | 0           | 0          | 0         | 2            | 0              | 0          | 3          | 0           | 7           | 2            | 0       | 0  |
| Prunus L.              | 0         | 0            | 0           | 0          | 0          | 0           | 0             | 1            | 0           | 0          | 0         | 0            | 0              | 2          | 0          | 0           | 4           | 2            | 3       | 3  |
| Cichorium intybus      | 0         | 0            | 0           | 0          | 0          | 0           | 0             | 0            | 0           | 0          | 0         | 0            | 0              | 2          | 0          | 0           | 2           | 3            | 4       | 4  |
| Glechoma hederacea     | 0         | 0            | 0           | 0          | 0          | 0           | 0             | 0            | 0           | 0          | 0         | 0            | 0              | 4          | 0          | 0           | 2           | 3            | 2       | 2  |
| Leonurus cardiaca      | 0         | 0            | 0           | 0          | 0          | 0           | 0             | 0            | 0           | 0          | 0         | 0            | 0              | 1          | 2          | 0           | 3           | 4            | 1       | 1  |
| Corydalis DC.          | 0         | 0            | 0           | 0          | 0          | 0           | 0             | 0            | 0           | 0          | 0         | 0            | 0              | 0          | 2          | 0           | 0           | 3            | 5       | 5  |
| Lavatera L.            | 0         | 0            | 0           | 0          | 0          | 0           | 0             | 0            | 0           | 0          | 0         | 0            | 0              | 2          | 0          | 0           | 3           | 2            | 3       | 3  |
| Lotus corniculatus     | 0         | 0            | 0           | 0          | 0          | 0           | 0             | 0            | 0           | 0          | 0         | 0            | 0              | 0          | 3          | 0           | 2           | 3            | 2       | 2  |
| Rosa L.                | 0         | 0            | 0           | 0          | 0          | 0           | 0             | 0            | 0           | 0          | 0         | 0            | 0              | 3          | 0          | 0           | 2           | 1            | 4       | 4  |
| Filipendula ulmaria    | 0         | 0            | 0           | 1          | 0          | 0           | 0             | 0            | 0           | 0          | 0         | 0            | 0              | 0          | 0          | 0           | 5           | 3            | 3       | 3  |
| Linaria vulgaris       | 0         | 0            | 0           | 0          | 0          | 0           | 0             | 0            | 0           | 0          | 0         | 0            | 0              | 0          | 0          | 0           | 5           | 4            | 4       | 4  |
| Onopordium acris       | 0         | 0            | 0           | 0          | 0          | 0           | 0             | 1            | 1           | 0          | 0         | 1            | 0              | 0          | 0          | 0           | 2           | 1            | 3       | 3  |
| Stachys recta          | 0         | 0            | 0           | 0          | 0          | 0           | 0             | 0            | 1           | 0          | 0         | 0            | 0              | 5          | 0          | 0           | 0           | 3            | 0       | 0  |
| Aegopodium podagraria  | 0         | 0            | 0           | 0          | 0          | 0           | 0             | 0            | 0           | 0          | 0         | 0            | 0              | 1          | 0          | 0           | 2           | 2            | 3       | 3  |
| Prunella vulgaris      | 0         | 0            | 0           | 0          | 0          | 0           | 0             | 0            | 0           | 0          | 0         | 0            | 0              | 1          | 5          | 0           | 0           | 2            | 0       | 0  |
| Amorpha fruticosa      | 0         | 0            | 0           | 0          | 0          | 0           | 0             | 0            | 0           | 0          | 0         | 0            | 0              | 0          | 0          | 0           | 2           | 5            | 5       | 5  |
| Forsythia Vahl         | 0         | 0            | 0           | 0          | 0          | 0           | 0             | 0            | 0           | 0          | 0         | 0            | 0              | 3          | 0          | 0           | 1           | 1            | 2       | 2  |
| Medicago sativa        | 0         | 0            | 0           | 0          | 0          | 0           | 0             | 0            | 0           | 0          | 0         | 0            | 0              | 0          | 0          | 0           | 5           | 2            | 2       | 2  |
| Melampyrum nemorosum   | 0         | 0            | 0           | 0          | 0          | 0           | 0             | 0            | 0           | 0          | 0         | 0            | 0              | 0          | 0          | 0           | 4           | 2            | 2       | 2  |
| Scilla bifolia         | 0         | 0            | 0           | 0          | 0          | 0           | 0             | 0            | 0           | 0          | 0         | 0            | 0              | 1          | 0          | 0           | 3           | 2            | 0       | 0  |
| Viola L.               | 0         | 0            | 0           | 0          | 0          | 0           | 0             | 1            | 0           | 0          | 0         | 0            | 0              | 1          | 0          | 0           | 1           | 3            | 0       | 0  |
| Genista tinctoria      | 0         | 0            | 0           | 0          | 0          | 0           | 0             | 0            | 0           | 0          | 0         | 0            | 0              | 1          | 3          | 0           | 0           | 0            | 1       | 1  |
| Lythrum salicaria      | 0         | 0            | 0           | 0          | 0          | 0           | 0             | 0            | 2           | 0          | 0         | 0            | 0              | 0          | 1          | 0           | 0           | 1            | 1       | 1  |
| Digitalis grandiflora  | 0         | 0            | 0           | 0          | 0          | 0           | 0             | 0            | 0           | 0          | 0         | 0            | 0              | 0          | 0          | 0           | 4           | 0            | 0       | 0  |
| Tussilago farfara      | 0         | 0            | 0           | 0          | 0          | 0           | 0             | 0            | 0           | 0          | 0         | 0            | 0              | 0          | 0          | 0           | 2           | 2            | 0       | 0  |

Bumblebees species occurring in Kyiv

|                                                             | Site Bot.gard | Site Theofaniy | Site Nykyi | Site Babin yar | Site KPI | Site Part.slava | Site Peremoha | Site Lysa hora | Site Sovky | Site Svyatoshin | Site Hydropark | Site Trukhaniv | Site Muromets | Site Zhukiv | Site Teremki | Site Vinogradai | Site Zabolotno | Site Druzhby Ni | Site Saperno-Sl | Site Zakrevskol | Site Mayakovskoho |   |
|-------------------------------------------------------------|---------------|----------------|------------|----------------|----------|-----------------|---------------|----------------|------------|-----------------|----------------|----------------|---------------|-------------|--------------|-----------------|----------------|-----------------|-----------------|-----------------|-------------------|---|
| Bombus subterraneus (Linnaeus,1758)                         | 1             | 0              | 0          | 0              | 0        | 0               | 0             | 0              | 0          | 0               | 0              | 0              | 0             | 0           | 0            | 0               | 0              | 0               | 0               | 0               | 0                 | 0 |
| Bombus veteranus (Fabricius,1793)                           | 0             | 1              | 0          | 0              | 0        | 0               | 0             | 0              | 0          | 0               | 0              | 0              | 1             | 0           | 0            | 0               | 0              | 0               | 0               | 0               | 0                 | 0 |
| Bombus campestris (Panzer,1801)                             | 1             | 1              | 0          | 0              | 0        | 0               | 0             | 2              | 0          | 1               | 0              | 0              | 0             | 1           | 0            | 0               | 0              | 0               | 0               | 0               | 0                 | 0 |
| Bombus rupestris (Fabricius,1793)                           | 0             | 0              | 0          | 0              | 0        | 0               | 0             | 0              | 0          | 0               | 0              | 0              | 2             | 2           | 0            | 0               | 0              | 0               | 0               | 0               | 0                 | 0 |
| Bombus vestalis (Geoffroy,1785)                             | 1             | 1              | 0          | 0              | 0        | 0               | 0             | 1              | 0          | 0               | 0              | 1              | 1             | 1           | 0            | 0               | 0              | 0               | 0               | 0               | 0                 | 0 |
| Bombus muscorum Linnaeus, 1758                              | 2             | 0              | 0          | 0              | 0        | 0               | 0             | 0              | 0          | 0               | 0              | 0              | 0             | 0           | 0            | 0               | 0              | 0               | 0               | 0               | 0                 | 0 |
| Bombus pratorum (Linnaeus,1761)                             | 2             | 0              | 0          | 0              | 0        | 0               | 0             | 4              | 0          | 0               | 0              | 0              | 0             | 0           | 0            | 0               | 0              | 0               | 0               | 0               | 0                 | 0 |
| Bombus argillaceus (Scopoli, 1763)                          | 3             | 2              | 2          | 0              | 0        | 0               | 0             | 1              | 0          | 0               | 0              | 0              | 0             | 0           | 0            | 0               | 0              | 0               | 0               | 0               | 0                 | 0 |
| <b>Bombus sylvestris (Lepeletier,1832)</b>                  | 0             | 2              | 0          | 0              | 0        | 0               | 0             | 3              | 0          | 0               | 0              | 0              | 2             | 2           | 0            | 0               | 0              | 0               | 0               | 0               | 0                 | 0 |
| Bombus bohemicus (Seidl,1837)                               | 1             | 0              | 0          | 0              | 0        | 0               | 0             | 2              | 0          | 0               | 2              | 0              | 2             | 2           | 0            | 0               | 0              | 0               | 0               | 0               | 0                 | 0 |
| Bombus sylvorum (Linnaeus,1761)                             | 3             | 0              | 0          | 0              | 0        | 0               | 0             | 0              | 0          | 0               | 0              | 0              | 3             | 2           | 0            | 0               | 0              | 0               | 0               | 0               | 0                 | 0 |
| Bombus humilis Illiger, 1806                                | 0             | 7              | 0          | 0              | 0        | 0               | 0             | 7              | 0          | 0               | 0              | 0              | 0             | 0           | 0            | 0               | 0              | 0               | 0               | 0               | 0                 | 0 |
| Bombus soroeensis (Fabricius,1777)                          | 13            | 3              | 0          | 0              | 0        | 0               | 0             | 0              | 0          | 2               | 0              | 2              | 0             | 0           | 0            | 0               | 0              | 0               | 0               | 0               | 0                 | 0 |
| Bombus hortorum (Linnaeus,1761)                             | 5             | 5              | 0          | 0              | 0        | 5               | 0             | 2              | 0          | 0               | 0              | 0              | 6             | 5           | 0            | 0               | 0              | 0               | 0               | 0               | 0                 | 0 |
| Bombus hyperorum (Linnaeus,1758)                            | 11            | 11             | 16         | 15             | 0        | 13              | 7             | 9              | 3          | 14              | 15             | 20             | 2             | 2           | 2            | 2               | 0              | 0               | 0               | 0               | 0                 | 0 |
| Bombus ruderarius (Müller, 1776)                            | 31            | 15             | 0          | 0              | 0        | 0               | 0             | 5              | 0          | 0               | 0              | 0              | 10            | 10          | 0            | 0               | 0              | 0               | 0               | 0               | 0                 | 0 |
| Bombus pascuorum (Scopoli, 1763)                            | 13            | 13             | 23         | 17             | 4        | 17              | 24            | 23             | 14         | 16              | 12             | 4              | 12            | 9           | 12           | 7               | 1              | 2               | 1               | 1               | 1                 | 0 |
| Bombus lapidarius (Linnaeus,1758)                           | 81            | 30             | 32         | 37             | 14       | 31              | 33            | 77             | 32         | 36              | 41             | 33             | 38            | 42          | 14           | 21              | 1              | 4               | 1               | 3               | 2                 | 2 |
| Bombus (Bombus) lucorum [L., 1761]/B. terrestris (Linnaeus) | 134           | 90             | 47         | 45             | 33       | 61              | 43            | 98             | 55         | 72              | 49             | 74             | 47            | 54          | 26           | 32              | 3              | 1               | 3               | 5               | 6                 | 6 |
|                                                             | 302           | 181            | 120        | 114            | 51       | 127             | 107           | 234            | 104        | 141             | 119            | 134            | 126           | 132         | 54           | 62              | 5              | 7               | 5               | 9               | 8                 | 8 |

Species diversity indicators of bumblebee groups on the model territories

| Taxa_S      | Bot.gard. | Feofaniya | Nyuki  | Babin yar | KPI    | Part_slava | Peremoha | Lysa hora | Sovky  | Svyatoshin | Hydropark | Trukhaniv | Muromets | Zhukiv | Teremki | Vinogradar | Zabolotno | Druzhby N | Saperno-SI | Zakrevskol | Mayakovskoho |        |   |
|-------------|-----------|-----------|--------|-----------|--------|------------|----------|-----------|--------|------------|-----------|-----------|----------|--------|---------|------------|-----------|-----------|------------|------------|--------------|--------|---|
| Individuals | 301       | 181       | 120    | 114       | 51     | 127        | 107      | 234       | 104    | 141        | 119       | 134       | 126      | 132    | 54      | 62         | 5         | 7         | 5          | 9          | 5            | 8      |   |
| Dominance   | 0.2869    | 0.2933    | 0.2793 | 0.3007    | 0.5002 | 0.3202     | 0.3112   | 0.2969    | 0.3933 | 0.3489     | 0.3146    | 0.3891    | 0.2494   | 0.2865 | 0.3498  | 0.3949     | 0.44      | 0.4286    | 0.44       | 0.4321     | 0.625        | 0.625  |   |
| Simpson 1   | 0.7131    | 0.7067    | 0.7207 | 0.6993    | 0.4998 | 0.6798     | 0.6888   | 0.7031    | 0.6067 | 0.6511     | 0.6854    | 0.6109    | 0.7506   | 0.7135 | 0.6502  | 0.6051     | 0.56      | 0.5714    | 0.56       | 0.5679     | 0.375        | 0.375  |   |
| Shannon H   | 1.623     | 1.69      | 1.373  | 1.283     | 0.8362 | 1.326      | 1.243    | 1.565     | 1.072  | 1.264      | 1.294     | 1.161     | 1.728    | 1.588  | 1.158   | 1.065      | 0.9503    | 0.9557    | 0.9503     | 0.9369     | 0.5623       | 0.5623 |   |
| Evenness    | 0.3622    | 0.4167    | 0.7895 | 0.9017    | 0.7692 | 0.7534     | 0.8663   | 0.3679    | 0.7302 | 0.5896     | 0.7292    | 0.5322    | 0.4692   | 0.4449 | 0.796   | 0.7253     | 0.8621    | 0.8668    | 0.8621     | 0.8507     | 0.8774       | 0.8774 |   |
| Brillouin   | 1.55      | 1.581     | 1.304  | 1.222     | 0.7644 | 1.259      | 1.181    | 1.48      | 1.013  | 1.198      | 1.226     | 1.096     | 1.593    | 1.469  | 1.059   | 0.9792     | 0.5991    | 0.6649    | 0.5991     | 0.6914     | 0.4165       | 0.4165 |   |
| Menhinick   | 0.8069    | 0.9663    | 0.4564 | 0.3746    | 0.4201 | 0.4437     | 0.3867   | 0.8498    | 0.3922 | 0.5053     | 0.4583    | 0.5183    | 1.069    | 0.9574 | 0.5443  | 0.508      | 1.342     | 1.134     | 1.342      | 1          | 0.7071       | 0.7071 |   |
| Margalef    | 2.278     | 2.308     | 0.8355 | 0.6334    | 0.5087 | 0.8257     | 0.642    | 2.2       | 0.6459 | 1.01       | 0.837     | 1.021     | 2.274    | 2.048  | 0.7521  | 0.7269     | 1.243     | 1.028     | 1.243      | 0.9102     | 0.4809       | 0.4809 |   |
| Equitabilit | 0.6152    | 0.6588    | 0.8352 | 0.9253    | 0.7611 | 0.8241     | 0.8965   | 0.6101    | 0.7731 | 0.7052     | 0.8037    | 0.648     | 0.6955   | 0.6622 | 0.8355  | 0.7683     | 0.865     | 0.8699    | 0.865      | 0.8528     | 0.8113       | 0.8113 |   |
| Fisher alp  | 3.04      | 3.21      | 1.054  | 0.8068    | 0.6965 | 1.039      | 0.8198   | 2.968     | 0.8258 | 1.272      | 1.056     | 1.289     | 3.261    | 2.853  | 0.9976  | 0.955      | 3.167     | 1.989     | 3.167      | 1.576      | 0.8559       | 0.8559 |   |
| Berger-Par  | 0.4452    | 0.4972    | 0.3917 | 0.3947    | 0.6471 | 0.4803     | 0.4019   | 0.4188    | 0.5288 | 0.5106     | 0.4118    | 0.5522    | 0.373    | 0.4091 | 0.4815  | 0.5161     | 0.6       | 0.5714    | 0.6        | 0.5556     | 0.75         | 0.75   |   |
| Chao-1      | 15        | 14        | 5      | 4         | 3      | 5          | 4        | 13,25     | 4      | 6          | 5         | 6         | 12,2     | 11     | 4       | 4          | 4         | 3         | 4          | 3          | 4            | 2      | 2 |
